# Supplementary material for: Population Attributable Fraction of Helicobacter pylori Infection–Related Gastric Cancer in Korea: A Meta-Analysis
Source: PubMed Central journal article supplement — Cancer Res Treat. 2020 Dec 15;53(3):744–53. doi: 10.4143/crt.2020.610 (PMC8291171; doi:10.4143/crt.2020.610), 2020-12-15
Supplement: crt-2020-610-suppl2.pdf [file crt-2020-610-suppl2.pdf]

**S2 Table.** Comparison of results from sensitivity analysis using the selected nine studies

| Prevalence estimates of<br><i>Helicobacter pylori</i> by<br>year | Overall GC<br>(11 studies) | Overall GC<br>(9 studies with adjustment for<br>smoking and alcohol drinking) |
|------------------------------------------------------------------|----------------------------|-------------------------------------------------------------------------------|
|                                                                  | PAF, both                  | PAF, both                                                                     |
| Pooled OR                                                        | 1.69 (1.29-2.22)           | 1.72 (1.55-1.92)                                                              |
| 1990 <sup>a)</sup>                                               | 33.9 (17.7-47.5)           | 34.9 (29.0-40.6)                                                              |
| 1998                                                             | 31.6 (16.2-44.9)           | 32.5 (26.9-38.1)                                                              |
| 2005                                                             | 28.8 (14.5-41.7)           | 29.7 (24.4-35.0)                                                              |
| 2011                                                             | 27.3 (13.6-39.9)           | 28.2 (23.1-33.4)                                                              |
| 2016                                                             | 23.2 (11.3-34.9)           | 24.0 (19.4-28.8)                                                              |

GC, gastric cancer; OR, odds ratio; PAF, population attributable fraction. <sup>a)</sup>Estimates extrapolated backward using the reported *H. pylori* prevalences in 1998, 2005, 2011, and 2016.
