# Supplementary material for: Population Attributable Fraction of Helicobacter pylori Infection–Related Gastric Cancer in Korea: A Meta-Analysis
Source: PubMed Central journal article supplement — Cancer Res Treat. 2020 Dec 15;53(3):744–53. doi: 10.4143/crt.2020.610 (PMC8291171; doi:10.4143/crt.2020.610), 2020-12-15
Supplement: crt-2020-610-suppl3.pdf [file crt-2020-610-suppl3.pdf]

**S3 Table.** PAF (%) for gastric cancer due to *Helicobacter pylori* infection in Koreans

| Prevalence estimates<br>of <i>H. pylori</i> by year | PAF, both           |                     |                     |                     |                      |
|-----------------------------------------------------|---------------------|---------------------|---------------------|---------------------|----------------------|
|                                                     | Overall GC          | Non-cardia GC       | Cardia GC           | Early stage GC      | Advanced stage GC    |
| Pooled OR                                           | 1.69 (1.29 to 2.22) | 2.17 (1.04 to 4.55) | 1.97 (1.02 to 3.77) | 2.31 (0.93 to 5.75) | 1.54 (0.39 to 6.08)  |
| 1990 <sup>a</sup>                                   | 33.9 (17.7 to 47.5) | 46.5 (2.9 to 72.5)  | 41.9 (1.5 to 67.3)  | 49.3 (−5.5 to 77.9) | 28.6 (−82.9 to 79.1) |
| 1998                                                | 31.6 (16.2 to 44.9) | 43.9 (2.6 to 70.4)  | 39.4 (1.3 to 65.0)  | 46.7 (−4.9 to 76.1) | 26.5 (−68.9 to 77.3) |
| 2005                                                | 28.8 (14.5 to 41.7) | 40.7 (2.3 to 67.5)  | 36.2 (1.2 to 61.9)  | 43.4 (−4.3 to 73.6) | 24.0 (−55.6 to 74.9) |
| 2011                                                | 27.3 (13.6 to 39.9) | 38.9 (2.1 to 65.9)  | 34.6 (1.1 to 60.2)  | 41.7 (−4.0 to 72.1) | 22.7 (−49.8 to 73.5) |
| 2016                                                | 23.2 (11.3 to 34.9) | 33.9 (1.7 to 60.9)  | 29.9 (0.9 to 54.9)  | 36.5 (−3.2 to 67.6) | 19.2 (−36.6 to 69.0) |

GC, gastric cancer; OR, odds ratio; PAF, population attributable fraction. <sup>a</sup>Estimates extrapolated backward using the reported *H. pylori* prevalences in 1998, 2005, 2011, 2016.
