# Supplementary figures and images for: Population Attributable Fraction of Helicobacter pylori Infection–Related Gastric Cancer in Korea: A Meta-Analysis
Source: PubMed Central journal article supplement — Cancer Res Treat. 2020 Dec 15;53(3):744–53. doi: 10.4143/crt.2020.610 (PMC8291171; doi:10.4143/crt.2020.610), 2020-12-15

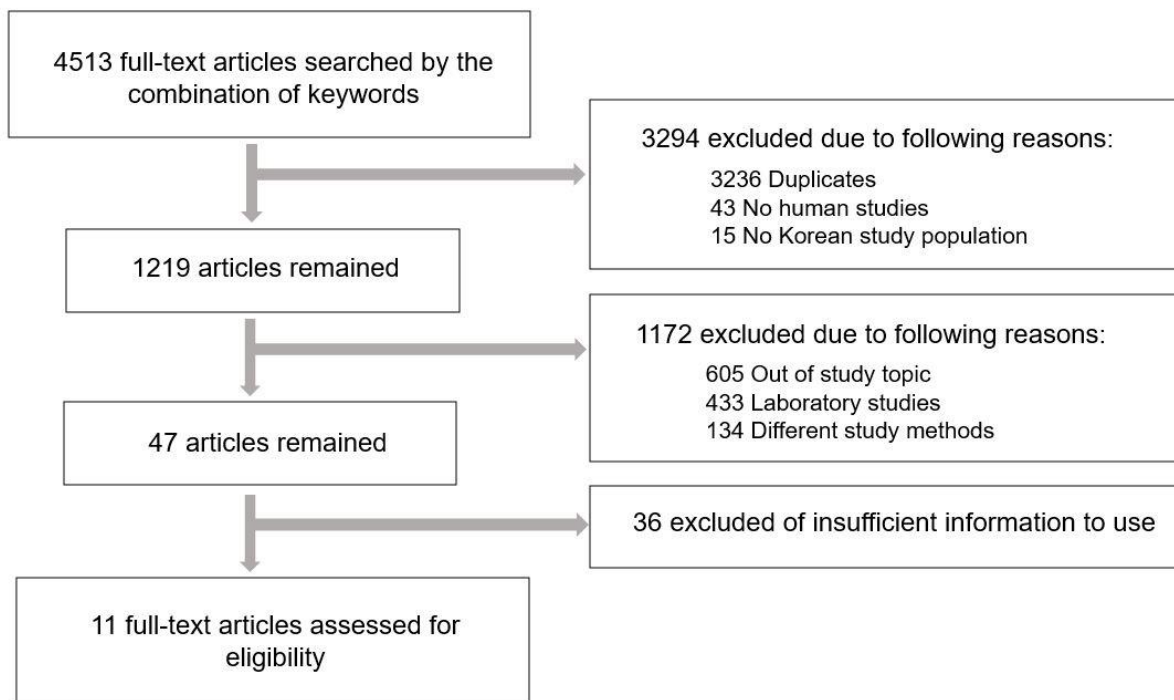

**S1 Fig.** Flowchart of systematic review.

Supplement: crt-2020-610-suppl1.pdf [file crt-2020-610-suppl1.pdf]
